# Supplementary material
Source: bioRxiv or medRxiv preprint supplement (https://www.biorxiv.org/highwire/filestream/47047/field_highwire_adjunct_files/2/137695-2.pdf)

**A**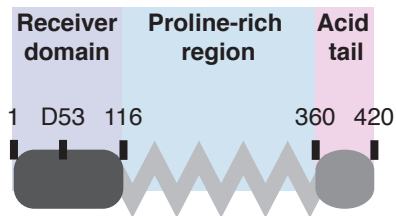**B**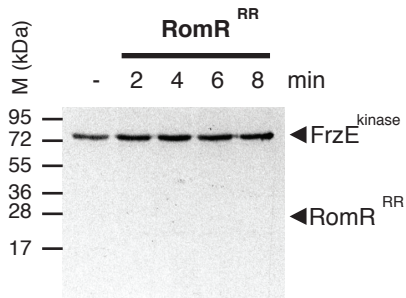**C**

WT

*romR**romRD53E**romRD53N*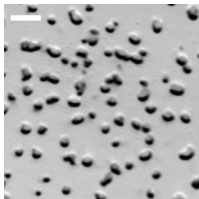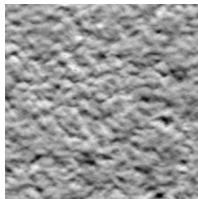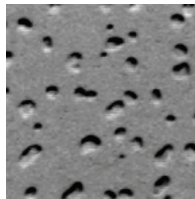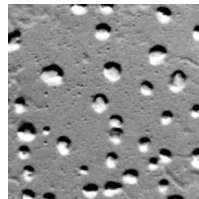

Supplement: Supplementary file [file 137695-2.pdf]
